# Supplementary material for: Enzyme catalytic promiscuity: lipase catalyzed synthesis of substituted 2H-chromenes by a three-component reaction
Source: Royal Society of Chemistry journal article supplement (doi:10.1039/c4ra03367a), 2014-01-01
Supplement: c4ra03367a1.pdf [file c4ra03367a1.pdf]

Enzyme catalytic promiscuity: Lipase catalyzed synthesis of substituted 2H-chromenes by three-component reaction

Fengjuan Yang <sup>a,b</sup>, Zhi Wang <sup>a,b,#</sup>, Haoran Wang <sup>a,b</sup>, Hong Zhang <sup>a,c</sup>, Hong Yue <sup>a,b</sup>, Lei Wang <sup>a,b,\*</sup>

*a* Key Laboratory of Molecular Enzymology and Engineering of Ministry of Education, Jilin University, Changchun 130023, China

*b* College of Life Science, Jilin University, Changchun 130023, China

*c* College of Chemistry, Jilin University, Changchun 130023, China

## Supporting Information

### 1 Materials

Porcine pancreas lipase (PPL), *Candida antarctica* lipase B (CALB), *Pseudomonas sp.* lipase (PSL), *C. rugosa* lipase (CRL), Bovine serum albumin (BSA) and salicylaldehyde used in this study were purchased from Sigma (Beijing, China). These enzymes were used after lyophilization for enzymatic reaction without further purification. All the chemical reagents were purchased from Shanghai Chemical Reagent Company (Shanghai, China). Commercially available reagents and solvents were used without further purification. NMR spectra were recorded on an Inova 500 (1H, 500 MHz) spectrometer.

### 2 <sup>1</sup>H-NMR data of compounds 4a-4g

**4a:** <sup>1</sup>H NMR (500 MHz, CDCl<sub>3</sub>) δ 1.90 (s, 3H), 2.44 (s, 3H), 3.24 (s, 3H), 6.95 (m, 2H), 7.24 (d, *J* = 7.5 Hz, 1H), 7.31 (t, *J* = 8.0 Hz, 1H), 7.52 (s, 1H); <sup>13</sup>C NMR (500 MHz, CDCl<sub>3</sub>) δ 195.5, 153.4, 136.9, 132.4, 132.2, 128.1, 121.7, 118.6, 116.3, 101.8, 50.0, 27.3, 24.9.

**4b:** <sup>1</sup>H NMR (500 MHz, CDCl<sub>3</sub>) δ 1.1 (t, *J* = 7.0 Hz, 3H), 1.89 (s, 3H), 2.45 (s, 3H), 3.48 (m, 2H), 6.94 (m, 2H), 7.23 (d, *J* = 7.5 Hz, 1H), 7.31 (t, *J* = 7.5 Hz, 1H), 7.51 (s, 1H); <sup>13</sup>C NMR (500 MHz, CDCl<sub>3</sub>) δ 195.4, 153.4, 135.3, 132.5, 132.7, 129.2, 121.6, 119.0, 116.6, 101.2, 58.8, 27.5, 26.2, 15.1.

**4c:** <sup>1</sup>H NMR (500 MHz, CDCl<sub>3</sub>) δ 0.81 (t, *J* = 7.5 Hz, 3H), 1.20 (m, 2H), 1.47 (t, *J* = 7.5 Hz, 2H), 1.91 (s, 3H), 2.46 (s, 3H), 3.47 (m, 2H), 6.94 (m, 2H), 7.24 (d, *J* = 7.5 Hz, 1H), 7.32 (t, *J* = 7.5 Hz, 1H), 7.58 (s, 1H); <sup>13</sup>C NMR (500 MHz, CDCl<sub>3</sub>) δ 195.7, 153.1, 135.5, 133.5, 132.1, 128.2, 121.6, 118.8, 116.4, 102.1, 63.2, 30.6, 27.4, 25.3, 18.9, 13.6.

**4d:** <sup>1</sup>H NMR (500 MHz, CDCl<sub>3</sub>) δ 0.81 (t, *J* = 7.0 Hz, 3H), 1.20 (m, 4H), 1.47 (t, *J* = 7.0 Hz, 2H), 1.91 (s, 3H), 2.46 (s, 3H), 3.40 (dd, *J* = 7.0 Hz, 15.5 Hz, 1H), 3.480 (dd, *J* = 6.5 Hz, 15.5 Hz, 1H), 6.95 (m, 2H), 7.24 (d, *J* = 7.5 Hz, 1H), 7.32 (t, *J* = 7.5 Hz, 1H), 7.49 (s, 1H); <sup>13</sup>C NMR (500 MHz, CDCl<sub>3</sub>) δ 195.9, 153.8, 135.9, 132.3, 131.5, 128.5, 120.2, 118.0, 115.3, 101.1, 64.1, 30.4, 28.1, 27.6, 23.6, 22.7, 14.1.

**4e:** <sup>1</sup>H NMR (500 MHz, CDCl<sub>3</sub>) δ 0.98 (d, *J* = 6.0 Hz, 3H), 1.13 (d, *J* = 6.0 Hz, 3H), 1.96 (s, 3H), 2.46 (s, 3H), 4.07 (t, *J* = 6.0 Hz, 1H), 6.91 (d, *J* = 8.0 Hz, 1H), 6.97 (t, *J*

= 7.5 Hz, 1H), 7.24 (d, J = 7.5 Hz, 1H), 7.32 (t, J = 7.5 Hz, 1H), 7.49 (s, 1H); <sup>13</sup>C NMR (500 MHz, CDCl<sub>3</sub>) δ 195.5, 153.5, 136.9, 132.3, 131.5, 128.4, 121.2, 119.2, 116.3, 102.3, 63.8, 27.8, 24.6, 22.8, 22.8.

**4f:** <sup>1</sup>H NMR (500 MHz, CDCl<sub>3</sub>) δ 2.01 (s, 3H), 2.45 (s, 3H), 4.52 (d, J = 11.5 Hz, 1H), 4.57 (d, J = 11.5 Hz, 1H), 6.93 (d, J = 8.0 Hz, 1H), 6.99 (t, J = 7.5 Hz, 1H), 7.21 (m, 5H), 7.33 (t, J = 7.5 Hz, 1H), 7.36 (d, J = 4.5 Hz, 1H), 7.53 (s, 1H); <sup>13</sup>C NMR (500 MHz, CDCl<sub>3</sub>) δ 195.5, 153.4, 141.8, 136.5, 132.9, 131.6, 129.1, 128.9, 128.6, 128.1, 127.8, 127.5, 120.2, 117.0, 116.3, 104.7, 62.6, 27.7, 24.4.

**4g:** <sup>1</sup>H NMR (500 MHz, CDCl<sub>3</sub>) δ 1.91 (s, 3H), 2.39 (s, 3H), 2.78 (m, 2H), 3.64 (dd, J = 8.5 Hz, J = 15.5 Hz, 1H), 3.70 (dd, J = 9.0 Hz, J = 15.5 Hz, 1H), 6.88 (d, J = 8.0 Hz, 1H), 6.95 (t, J = 7.5 Hz, 1H), 7.08 (d, J = 7.5 Hz, 2H), 7.13 (t, J = 7.5 Hz, 1H), 7.20 (m, 3H), 7.29 (t, J = 7.5 Hz, 1H), 7.47 (s, 1H); <sup>13</sup>C NMR (500 MHz, CDCl<sub>3</sub>) δ 195.7, 153.8, 141.6, 136.2, 132.8, 131.5, 129.6, 128.4, 128.2, 127.9, 127.6, 127.1, 120.9, 117.3, 116.3, 105.1, 63.8, 35.7, 27.9, 24.8.
